# Supplementary material for: Genome Characterization of Lactiplantibacillus plantarum Strain UTNGt2 Originated from Theobroma grandiflorum (White Cacao) of Ecuadorian Amazon: Antimicrobial Peptides from Safety to Potential Applications
Source: PubMed Central journal article supplement (PMC8066128; doi:10.3390/antibiotics10040383), 2021-04-03
Supplement: antibiotics-10-00383-s001.pdf [file antibiotics-10-00383-s001.pdf]

Article

# Genome Characterization of *Lactiplantibacillus plantarum* Strain UTNGt2 Originated from *Theobroma grandiflorum* (White Cacao) of Ecuadorian Amazon: Antimicrobial Peptides from Safety to Potential Applications

Gabriela N. Tenea \* and Clara Ortega

**Table S1.** Assembly summary results.

| Sample | Contigs | Total contig bases | N50     | Max length | Min length | Mean length |
|--------|---------|--------------------|---------|------------|------------|-------------|
| UTNGt2 | 31      | 3,264,448          | 186,152 | 307,684    | 1,169      | 105,304     |

Contigs: The number of contigs assembled; Total bases of contigs: The total length of contigs; N50: 50% of all contig bases come from contigs longer than this value; Max length: The length of the longest contig; Min length: The length of the shortest contig; Mean length: The average length of contigs assembled.

**Table S2.** Mapping overall results.

| Library name | Total reads | Mapped reads       | Coverage (%) | Depth  | Ins.size (Std.) |
|--------------|-------------|--------------------|--------------|--------|-----------------|
| UTNGt2       | 5,258,542   | 5,258,086 (99.99%) | 100.00       | 160.15 | 454.46 (93.64)  |

Legend: Library name: Sample's library name; Total reads: Total number of reads; Mapped reads: Total number of mapped reads; Coverage (%): The percentage of mapped sites ( $\geq 1x$ ); Depth: Average mapping depth; Ins.size (Std.): The length between adapters and standard deviation of predicted length.

**Table S3.** BUSCO analysis results. Used Lineage: bacteria\_odb9 (number of species: 3663, number of BUSCOs: 148).

| Status                              | # of BUSCOs | Percentage (%) |
|-------------------------------------|-------------|----------------|
| Complete BUSCOs (C)                 |             |                |
| Complete and single-copy BUSCOs (S) | 142         | 95.95          |
| Complete and duplicated BUSCOs (D)  | 2           | 1.35           |
| Fragmented BUSCOs (F)               | 1           | 0.68           |
| Missing BUSCOs (M)                  | 3           | 2.03           |
| Total BUSCO groups searched         | 148         | 100            |

Status: A quantitative assessment list of the completeness in terms of expected gene content. The following two conditions were used to create a status: a. Expected range of scores; b. Expected range of length alignments. If both conditions are met, it is classified as Complete (These complete busco matches are either single-copy or duplicated). If length alignments is not met, it is classified

as Fragmented. If both conditions are not met, it is classified as Missing. # of BUSCOs: Identified count in sample; Percentage: Identified percentage in sample.

**Table 4.** List of reference ID genomes, species, and lineage used for phylogenetic analysis retrieved from the gyType database.

| Reference ID                    | query1/ Gt2    | Species                                                      | Lineage                                                                                                                                      |
|---------------------------------|----------------|--------------------------------------------------------------|----------------------------------------------------------------------------------------------------------------------------------------------|
| GCA_0000.0114/98.97/99.143745.1 | 01/99.07/99.07 | <i>Lactobacillus plantarum</i>                               | k__Bacteria p__Firmicutes c__Bacilli o__Lactobacillales f__Lactobacillaceae g__Lactobacillus s__Lactobacillus plantarum                      |
| GCA_0030.0342/95.08/95.641165.1 | 68/95.48/95.49 | <i>Lactobacillus plantarum</i> subsp. <i>argenteratensis</i> | k__Bacteria p__Firmicutes c__Bacilli o__Lactobacillales f__Lactobacillaceae g__Lactobacillus s__Lactobacillus plantarum                      |
| GCA_0030.0883/85.70/87.641145.1 | 70/86.10/86.28 | <i>Lactobacillus paraplantarum</i>                           | k__Bacteria p__Firmicutes c__Bacilli o__Lactobacillales f__Lactobacillaceae g__Lactobacillus s__Lactobacillus paraplantarum                  |
| GCA_0030.1519/79.24/82.641185.1 | 55/79.69/79.98 | <i>Lactobacillus pentosus</i>                                | k__Bacteria p__Firmicutes c__Bacilli o__Lactobacillales f__Lactobacillaceae g__Lactobacillus s__Lactobacillus pentosus                       |
| GCA_0050.1823/74.22/80.405405.1 | 23/74.95/75.10 | <i>Lactobacillus plajomi</i>                                 | k__Bacteria p__Firmicutes c__Bacilli o__Lactobacillales f__Lactobacillaceae g__Lactobacillus s__Lactobacillus plajomi                        |
| GCA_0010.1868/76.72/80.039045.1 | 49/77.19/77.41 | <i>Lactobacillus herbarum</i>                                | k__Bacteria p__Firmicutes c__Bacilli o__Lactobacillales f__Lactobacillaceae g__Lactobacillus s__Lactobacillus herbarum                       |
| GCA_004.02301/67.00/#/354495.1  | 67.80/68.71    | <i>Pediococcus pentosaceus</i>                               | k__Bacteria p__Firmicutes c__Bacilli o__Lactobacillales f__Lactobacillaceae g__Pediococcus s__Pediococcus pentosaceus                        |
| GCA_000.02438/65.33/#/769695.1  | 65.84/68.11    | <i>Oenococcus alcoholitolerans</i>                           | k__Bacteria p__Firmicutes c__Bacilli o__Lactobacillales f__Leuconostocaceae g__Oenococcus s__Oenococcus alcoholitolerans                     |
| GCA_000.02438/64.27/#/092505.1  | 64.81/66.30    | <i>Leuconostoc kimchii</i>                                   | k__Bacteria p__Firmicutes c__Bacilli o__Lactobacillales f__Leuconostocaceae g__Leuconostoc s__Leuconostoc kimchii                            |
| GCA_000.02438/64.40/#/014445.1  | 65.04/66.41    | <i>Leuconostoc mesenteroides</i>                             | k__Bacteria p__Firmicutes c__Bacilli o__Lactobacillales f__Leuconostocaceae g__Leuconostoc s__Leuconostoc mesenteroides                      |
| GCA_003.02438/64.65/#/363255.1  | 65.65/66.69    | <i>Weissella thailandensis</i>                               | k__Bacteria p__Firmicutes c__Bacilli o__Lactobacillales f__Leuconostocaceae g__Weissella s__Weissella thailandensis                          |
| GCA_012.02438/64.66/#/396435.1  | 65.78/67.26    | <i>Weissella hellenica</i>                                   | k__Bacteria p__Firmicutes c__Bacilli o__Lactobacillales f__Leuconostocaceae g__Weissella s__Weissella hellenica                              |
| GCA_900.02438/66.87/#/111205.1  | 67.73/68.55    | <i>Pediococcus ethanolidurans</i>                            | k__Bacteria p__Firmicutes c__Bacilli o__Lactobacillales f__Lactobacillaceae g__Pediococcus s__Pediococcus ethanolidurans                     |
| GCA_000.02438/64.73/#/160595.1  | 65.56/67.56    | <i>Leuconostoc mesenteroides</i> subsp. <i>cremoris</i>      | k__Bacteria p__Firmicutes c__Bacilli o__Lactobacillales f__Leuconostocaceae g__Leuconostoc s__Leuconostoc mesenteroides                      |
| GCA_001.02438/65.04/#/932615.1  | 65.97/67.41    | <i>Weissella jogaejeotgali</i>                               | k__Bacteria p__Firmicutes c__Bacilli o__Lactobacillales f__Leuconostocaceae g__Weissella s__Weissella jogaejeotgali                          |
| GCA_005.02630/64.94/#/405345.1  | 65.65/66.40    | <i>Enterococcus viikkiensis</i>                              | k__Bacteria p__Firmicutes c__Bacilli o__Lactobacillales f__Enterococcaceae g__Enterococcus s__Enterococcus viikkiensis                       |
| GCA_008.02630/60.97/#/086625.1  | 61.64/61.91    | <i>Acetobacterium bakii</i>                                  | k__Bacteria p__Firmicutes c__Clostridia o__Clostridiales f__Eubacteriaceae g__Acetobacterium s__Acetobacterium bakii                         |
| GCM100.02630/66.95/#/08912      | 67.91/68.76    | <i>Pediococcus parvulus</i>                                  | k__Bacteria p__Firmicutes c__Bacilli o__Lactobacillales f__Lactobacillaceae g__Pediococcus s__Pediococcus parvulus                           |
| GCA_000.02630/60.42/#/577815.1  | 61.42/62.58    | <i>Clostridium saudiense</i>                                 | k__Bacteria p__Firmicutes c__Clostridia o__Clostridiales f__Clostridiaceae g__Clostridium s__Clostridium saudiense                           |
| GCA_000.02630/65.30/#/260375.1  | 65.40/67.13    | <i>Leuconostoc carnosum</i>                                  | k__Bacteria p__Firmicutes c__Bacilli o__Lactobacillales f__Leuconostocaceae g__Leuconostoc s__Leuconostoc carnosum                           |
| GCA_002.02630/67.26/#/982135.1  | 68.08/69.18    | <i>Pediococcus inopinatus</i>                                | k__Bacteria p__Firmicutes c__Bacilli o__Lactobacillales f__Lactobacillaceae g__Pediococcus s__Pediococcus inopinatus                         |
| GCA_001.02630/66.72/#/437255.1  | 67.53/68.57    | <i>Pediococcus damnosus</i>                                  | k__Bacteria p__Firmicutes c__Bacilli o__Lactobacillales f__Lactobacillaceae g__Pediococcus s__Pediococcus damnosus                           |
| GCA_000.02960/59.41/#/373965.1  | 60.76/60.23    | <i>Uliginosibacterium gangwonense</i>                        | k__Bacteria p__Proteobacteria c__Betaproteobacteria o__Rhodocyclales f__Zoogloeaceae g__Uliginosibacterium s__Uliginosibacterium gangwonense |

|                                                 |                                     |                                                                                                                                              |
|-------------------------------------------------|-------------------------------------|----------------------------------------------------------------------------------------------------------------------------------------------|
| GCA_000 0.2960/60.02/#/<br>012545.1 60.57/64.33 | <i>Methanosphaera stadtmanae</i>    | k__Archaea p__Euryarchaeota c__Methanobacteria o__Methanobacteriales f__Methanobacteriaceae g__Methanosphaera s__Methanosphaera stadtmanae   |
| GCA_000 0.2960/60.48/#/<br>320405.1 61.63/62.32 | <i>Clostridium celatum</i>          | k__Bacteria p__Firmicutes c__Clostridia o__Clostridiales f__Clostridiaceae g__Clostridium s__Clostridium celatum                             |
| GCA_000 0.2960/61.15/#/<br>258405.1 61.77/63.54 | <i>Ignavibacterium album</i>        | k__Bacteria p__Ignavibacteriae c__Ignavibacteria o__Ignavibacteriales f__Ignavibacteriaceae g__Ignavibacterium s__Ignavibacterium album      |
| GCA_000 0.2960/61.20/#/<br>015285.1 61.75/61.94 | <i>Psychromonas ingrahamii</i>      | k__Bacteria p__Proteobacteria c__Gammaproteobacteria o__Alteromonadales f__Psychromonadaceae g__Psychromonas s__Psychromonas ingrahamii      |
| GCA_000 0.2960/64.21/#/<br>166735.2 65.08/66.82 | <i>Leuconostoc inhae</i>            | k__Bacteria p__Firmicutes c__Bacilli o__Lactobacillales f__Leuconostocaceae g__Leuconostoc s__Leuconostoc inhae                              |
| GCA_000 0.2960/61.74/#/<br>367405.1 62.87/64.78 | <i>Rickettsia prowazekii</i>        | k__Bacteria p__Proteobacteria c__Alphaproteobacteria o__Rickettsiales f__Rickettsiaceae g__Rickettsia s__Rickettsia prowazekii               |
| GCA_000 0.2960/61.00/#/<br>297255.1 61.63/63.63 | <i>Nitrolancea hollandica</i>       | k__Bacteria p__Chloroflexi c__Thermomicrobia o__Sphaerobacterales f__Sphaerobacteraceae g__Nitrolancea s__Nitrolancea hollandica             |
| GCA_000 0.2960/61.23/#/<br>378365.1 62.32/63.75 | <i>Megamonas rupellensis</i>        | k__Bacteria p__Firmicutes c__Negativicutes o__Selenomonadales f__Selenomonadaceae g__Megamonas s__Megamonas rupellensis                      |
| GCA_000 0.2960/60.89/#/<br>173355.1 61.61/62.61 | <i>Anaerococcus hydrogenalis</i>    | k__Bacteria p__Firmicutes c__Tissierellia o__Tissierellales f__Peptoniphilaceae g__Anaerococcus s__Anaerococcus hydrogenalis                 |
| GCA_000 0.2960/61.18/#/<br>378225.1 62.19/64.02 | <i>Methylophilus methylotrophus</i> | k__Bacteria p__Proteobacteria c__Betaproteobacteria o__Nitrosomonadales f__Methylophilaceae g__Methylophilus s__Methylophilus methylotrophus |
| GCA_000 0.2960/61.16/#/<br>153185.1 61.76/63.31 | <i>Reinekea blandensis</i>          | k__Bacteria p__Proteobacteria c__Gammaproteobacteria o__Oceanospirillales f__Saccharospirillaceae g__Reinekea s__Reinekea blandensis         |
| GCA_000 0.2960/62.74/#/<br>008045.1 63.34/63.83 | <i>Rickettsia typhi</i>             | k__Bacteria p__Proteobacteria c__Alphaproteobacteria o__Rickettsiales f__Rickettsiaceae g__Rickettsia s__Rickettsia typhi                    |
| GCA_000 0.2960/62.04/#/<br>257395.1 63.18/64.64 | <i>Diplorickettsia massiliensis</i> | k__Bacteria p__Proteobacteria c__Gammaproteobacteria o__Legionellales f__Coxiellaceae g__Diplorickettsia s__Diplorickettsia massiliensis     |
| GCA_000 0.2960/63.94/#/<br>376985.1 64.47/65.11 | <i>Streptococcus henryi</i>         | k__Bacteria p__Firmicutes c__Bacilli o__Lactobacillales f__Streptococcaceae g__Streptococcus s__Streptococcus henryi                         |
| GCA_000 0.2960/61.40/#/<br>300235.2 62.05/63.59 | <i>Thalassospira xiamenensis</i>    | k__Bacteria p__Proteobacteria c__Alphaproteobacteria o__Rhodospirillales f__Rhodospirillaceae g__Thalassospira s__Thalassospira xiamenensis  |
| GCA_0000.2960/61.44/#/#<br>299895.1 /63.61      | <i>Idiomarina xiamenensis</i>       | k__Bacteria p__Proteobacteria c__Gammaproteobacteria o__Alteromonadales f__Idiomarinaceae g__Idiomarina s__Idiomarina xiamenensis            |
| GCA_000 0.2960/60.49/#/<br>190595.1 61.66/62.73 | <i>Cellulophaga lytica</i>          | k__Bacteria p__Bacteroidetes c__Flavobacteriia o__Flavobacteriales f__Flavobacteriaceae g__Cellulophaga s__Cellulophaga lytica               |

Table S5. EggNOG category distribution result.

| Eggnog | Description                                                   | Count | Ratio (%) |
|--------|---------------------------------------------------------------|-------|-----------|
| J      | Translation, ribosomal structure and biogenesis               | 150   | 5.0573    |
| A      | RNA processing and modification                               | 0     | 0         |
| K      | Transcription                                                 | 251   | 8.4626    |
| L      | Replication, recombination and repair                         | 139   | 4.6864    |
| B      | Chromatin structure and dynamics                              | 0     | 0         |
| D      | Cell cycle control, cell division, chromosome partitioning    | 25    | 0.8429    |
| Y      | Nuclear structure                                             | 0     | 0         |
| V      | Defense mechanisms                                            | 70    | 2.3601    |
| T      | Signal transduction mechanisms                                | 73    | 2.4612    |
| M      | Cell wall/membrane/envelope biogenesis                        | 166   | 5.5968    |
| N      | Cell motility                                                 | 3     | 0.1011    |
| Z      | Cytoskeleton                                                  | 0     | 0         |
| W      | Extracellular structures                                      | 0     | 0         |
| U      | Intracellular trafficking, secretion, and vesicular transport | 23    | 0.7755    |
| O      | Posttranslational modification, protein turnover, chaperones  | 63    | 2.1241    |
| C      | Energy production and conversion                              | 110   | 3.7087    |

|              |                                                              |             |            |
|--------------|--------------------------------------------------------------|-------------|------------|
| G            | Carbohydrate transport and metabolism                        | 279         | 9.4066     |
| E            | Amino acid transport and metabolism                          | 201         | 6.7768     |
| F            | Nucleotide transport and metabolism                          | 86          | 2.8995     |
| H            | Coenzyme transport and metabolism                            | 72          | 2.4275     |
| I            | Lipid transport and metabolism                               | 56          | 1.8881     |
| P            | Inorganic ion transport and metabolism                       | 137         | 4.619      |
| Q            | Secondary metabolites biosynthesis, transport and catabolism | 17          | 0.5732     |
| R            | General function prediction only                             | 300         | 10.1146    |
| S            | Function unknown                                             | 745         | 25.118     |
| <b>Total</b> | -                                                            | <b>2966</b> | <b>100</b> |

count: number of genes; ratio (%): % of genes

**Table S6.** Antibiotic susceptibility of the UTNGt2 strain.

| Antimicrobial E-test strip   | MIC (mg/L) | Susceptibility* | EFSA cut-off values (mg/L)<br><i>Lactobacillus obligate</i><br>Heterofermentative [EFSA, 2012] |
|------------------------------|------------|-----------------|------------------------------------------------------------------------------------------------|
| Amoxicillin                  | 0.5        | S               | 4                                                                                              |
| Amoxicillin: clavulanic acid | 0.016      | S               | 4                                                                                              |
| Ampicillin                   | 0.5        | S               | 2                                                                                              |
| Cefotaxime                   | 0.002      | S               | 16                                                                                             |
| Erythromycin                 | 2          | S               | 1                                                                                              |
| Gentamycin                   | 16         | S               | 16                                                                                             |
| Penicillin                   | 0.25       | S               | 0.25                                                                                           |
| Tetracycline                 | 32         | S               | 32**                                                                                           |

\*The microbiological breakpoints reported by the FEEDAP were used to categorize lactobacilli as susceptible or resistant. The strains showing a MIC higher than the EFSA breakpoint were considered resistant. Susceptible (S): a bacterial strain is defined as susceptible when it is inhibited at a concentration of a specific antimicrobial equal to or lower than the established cut-off value ( $S \leq x$  mg / L). Resistant (R): a bacterial strain is defined as resistant when it is not inhibited at a concentration of a specific antimicrobial above the established cut-off value ( $R > x$  mg / L). \*\* MIC reference for *L. plantarum*.

**Table S7.** Summary of Prophage regions identified on the UTNGt2 genome using the PHASTER webserver.

| Contig | Region | Region length | Completeness | Score | # Total proteins | Region position | Most common Phage                   | GC%   |
|--------|--------|---------------|--------------|-------|------------------|-----------------|-------------------------------------|-------|
| 2      | 1      | 3.3 kb        | incomplete   | 20    | 6                | 214956-218324   | PHAGE_Xantho_Carpasina_NC_047962(1) | 49.04 |
| 3      | 1      | 6.2 kb        | incomplete   | 10    | 6                | 156134-162384   | PHAGE_Bacill_G_NC_023719(3)         | 47.85 |
| 5      | 1      | 9.4 kb        | incomplete   | 10    | 11               | 121969-131437   | PHAGE_Vibrio_YC_NC_048709(1)        | 44.83 |
| 6      | 3      | 39.9 kb       | intact       | 150   | 50               | 16543-56481     | PHAGE_Lactob_Sha1_NC_019489(27)     | 40.79 |

Legend: region: the number assigned to the region; region length: the length of the sequence in that region; completeness: a prediction of whether the region contains a intact or incomplete prophage based on the criteria: intact (score > 90%); questionable (score 70-90); incomplete (score < 70%); score: the score of the region based on the mentioned criteria; # total proteins: the number of ORFs present in the region; Region position: the start and end positions of the region on the bacterial chromosome; Most common phage: the phages (s) with the highest number of proteins most similar to those in the region; GC%: the percentage of GC nucleotides of the region.

**Table S8.** Description of the Cluster gene regions of UTNGt2 detected showing similarity on the MIBig database.

| Reference ID            | Similarity score | Type             | Compound(s)                      | Organism                                                 |
|-------------------------|------------------|------------------|----------------------------------|----------------------------------------------------------|
| <u>BGC000061</u><br>7.1 | 0.22             | RiPP             | coagulin                         | <i>Bacillus coagulans</i>                                |
| <u>BGC000140</u><br>7.1 | 0.16             | RiPP             | bicereucin                       | <i>Bacillus cereus</i> SJ1                               |
| <u>BGC000193</u><br>0.1 | 0.16             | RiPP             | pallidocin                       | <i>Aeribacillus pallidus</i>                             |
| <u>BGC000186</u><br>2.1 | 0.16             | RiPP             | geocillicin                      | <i>Aeribacillus pallidus</i>                             |
| <u>BGC000055</u><br>8.1 | 0.16             | RiPP             | sublancin 168                    | <i>Bacillus subtilis</i> subsp. <i>subtilis</i> str. 168 |
| <u>BGC000186</u><br>3.1 | 0.15             | RiPP,<br>Terpene | bacillicin CER074                | <i>Bacillus mycoides</i>                                 |
| <u>BGC000186</u><br>1.1 | 0.15             | RiPP             | bacillicin BAG2O                 | <i>Bacillus cereus</i> BAG2O-1                           |
| <u>BGC000048</u><br>4.1 | 0.15             | RiPP             | glycocin F                       | <i>Lactobacillus plantarum</i>                           |
| <u>BGC000050</u><br>0.1 | 0.14             | RiPP             | carnolysin A1, carnolysin A2     | <i>Carnobacterium maltaromaticum</i>                     |
| <u>BGC000050</u><br>4.1 | 0.14             | RiPP             | cytolysin ClyLI, cytolysin ClyLs | Plasmid pAD1                                             |
| <u>BGC000064</u><br>7.1 | 0.45             | Terpene          | carotenoid                       | <i>Rhodobacter sphaeroides</i>                           |
| <u>BGC000064</u><br>8.1 | 0.23             | Terpene          | carotenoid                       | <i>Myxococcus xanthus</i>                                |
| <u>BGC000065</u><br>6.1 | 0.23             | Terpene          | zeaxanthin                       | <i>Xanthobacter autotrophicus</i> Py2                    |
| <u>BGC000063</u><br>7.1 | 0.23             | Terpene          | carotenoid                       | <i>Corynebacterium glutamicum</i>                        |
| <u>BGC000064</u><br>5.1 | 0.21             | Terpene          | carotenoid                       | <i>Halobacillus halophilus</i> DSM 2266                  |
| <u>BGC000122</u><br>7.1 | 0.21             | Terpene          | isorenieratene                   | <i>Streptomyces collinus</i> Tu 365                      |
| <u>BGC000063</u><br>3.1 | 0.21             | Terpene          | carotenoid                       | <i>Streptomyces avermitilis</i>                          |
| <u>BGC000064</u><br>0.1 | 0.2              | Terpene          | carotenoid                       | <i>Enterobacteriaceae</i> bacterium DC404                |
| <u>BGC000063</u><br>6.1 | 0.2              | Terpene          | carotenoid                       | <i>Brevibacterium linens</i>                             |

|                                |      |            |                                                                |                                             |
|--------------------------------|------|------------|----------------------------------------------------------------|---------------------------------------------|
| <u>BGC000063</u><br><u>0.1</u> | 0.2  | Terpene    | (2R,3S,3'S)-2-hydroxyastaxanthin                               | <i>Paracoccus haeundaensis</i>              |
| <u>BGC000028</u><br><u>6.1</u> | 0.19 | Polyketide | viguiepinol                                                    | <i>Streptomyces sp.</i> KO-3988             |
| <u>BGC000055</u><br><u>4.1</u> | 0.16 | RiPP       | SRO15-3108                                                     | <i>Streptomyces filamentosus</i> NRRL 15998 |
| <u>BGC000155</u><br><u>1.1</u> | 0.16 | RiPP       | citrulassin E                                                  | <i>Streptomyces glaucescens</i>             |
| <u>BGC000038</u><br><u>6.1</u> | 0.16 | NRP        | malleobactin A, malleobactin B, malleobactin C, malleobactin D | <i>Burkholderia thailandensis</i> E264      |
| <u>BGC000055</u><br><u>1.1</u> | 0.16 | RiPP       | SapB                                                           | <i>Streptomyces coelicolor</i> A3(2)        |
| <u>BGC000020</u><br><u>5.1</u> | 0.16 | Polyketide | bryostatin                                                     | <i>Candidatus Endobugula sertula</i>        |
| <u>BGC000048</u><br><u>9.1</u> | 0.16 | RiPP       | enterocin AS-48                                                | <i>Enterococcus faecalis</i>                |
| <u>BGC000050</u><br><u>4.1</u> | 0.16 | RiPP       | cytolysin ClyLI, cytolysin ClyLs                               | Plasmid pAD1                                |
| <u>BGC000050</u><br><u>0.1</u> | 0.16 | RiPP       | carnolysin A1, carnolysin A2                                   | <i>Carnobacterium maltaromaticum</i>        |
| <u>BGC000049</u><br><u>0.1</u> | 0.16 | RiPP       | garvicin ML                                                    | <i>Lactococcus garvieae</i> DCC43           |

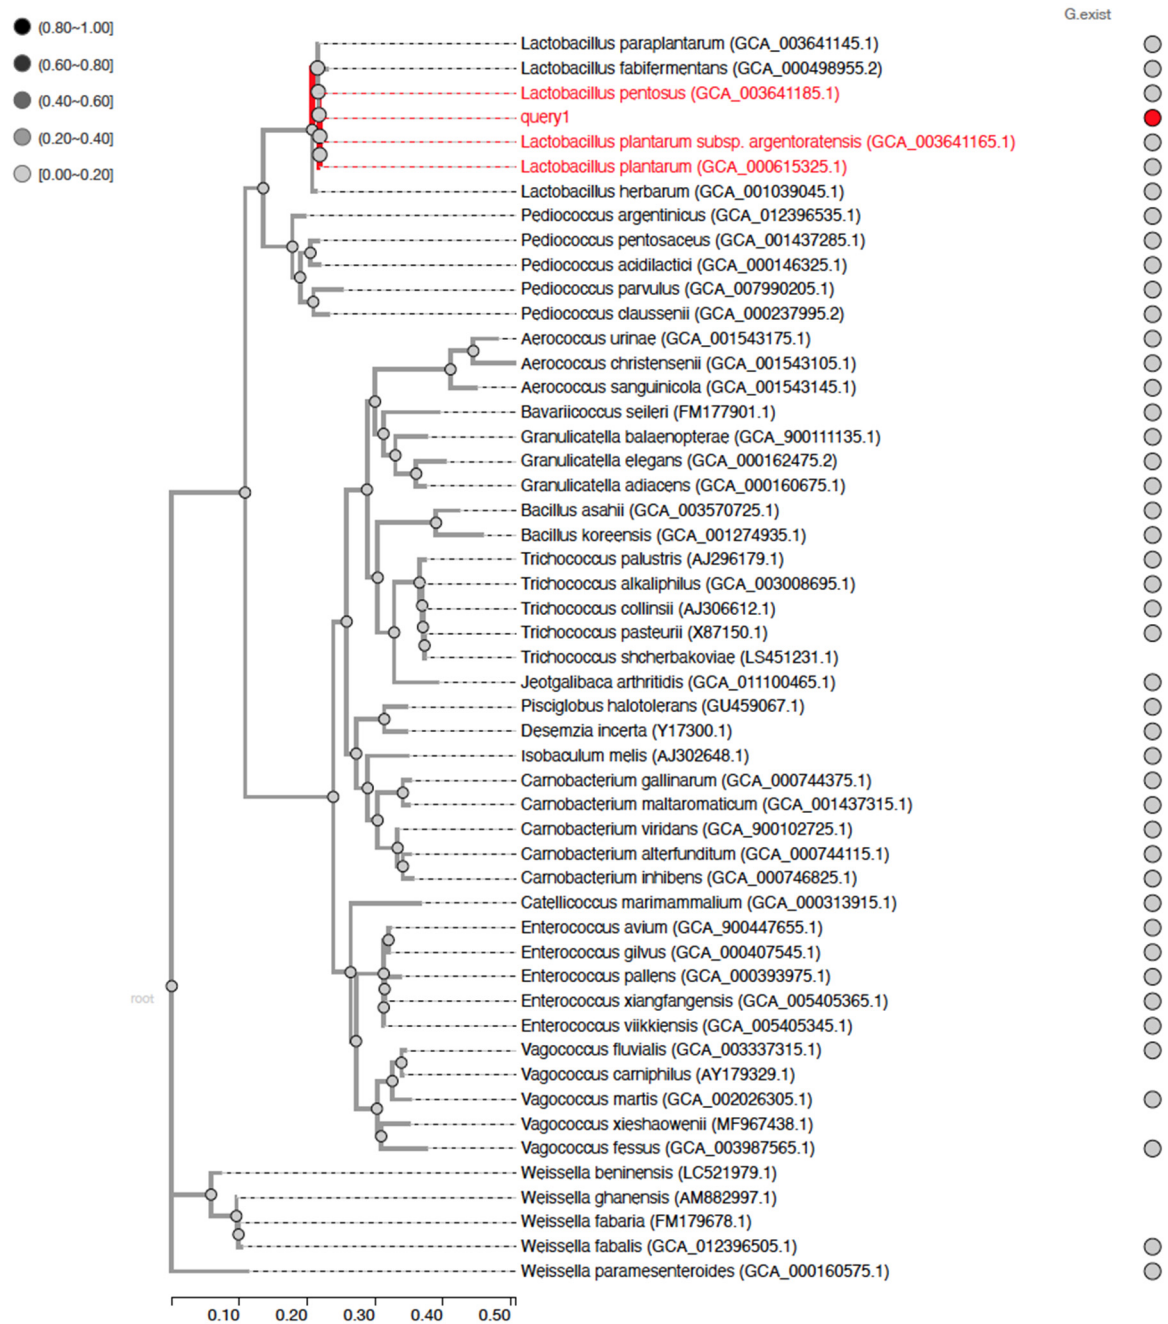

**Figure S1.** Phylogenetic tree based on the multiple alignment result of the target and selected 16S gene sequences to the gcType 16S rDNA gene database. Query 1: UTNGt2.
